# Supplementary material
Source: PubMed Central journal article supplement (PMC10984643)
Supplement: NIHMS1942609-supplement-Supplemental_Publication_Material.pdf [file NIHMS1942609-supplement-Supplemental_Publication_Material.pdf]

## SUPPLEMENTAL MATERIALS

Figure S1: Primary model architecture

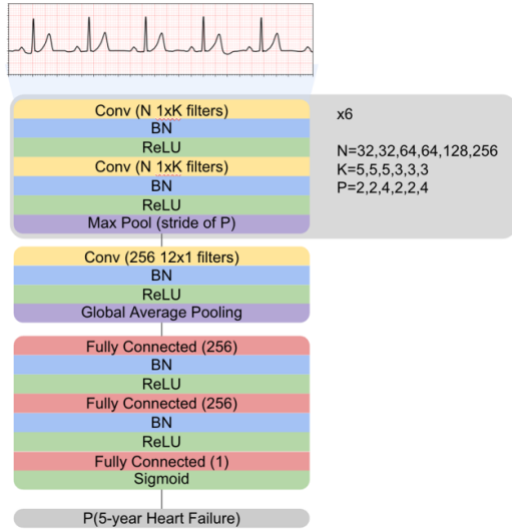

Figure S2: Breakdown of electrocardiogram (ECG) data: exclusions from prior heart failure, insufficient follow-up or lack of demographic record; training, testing, and validation splits

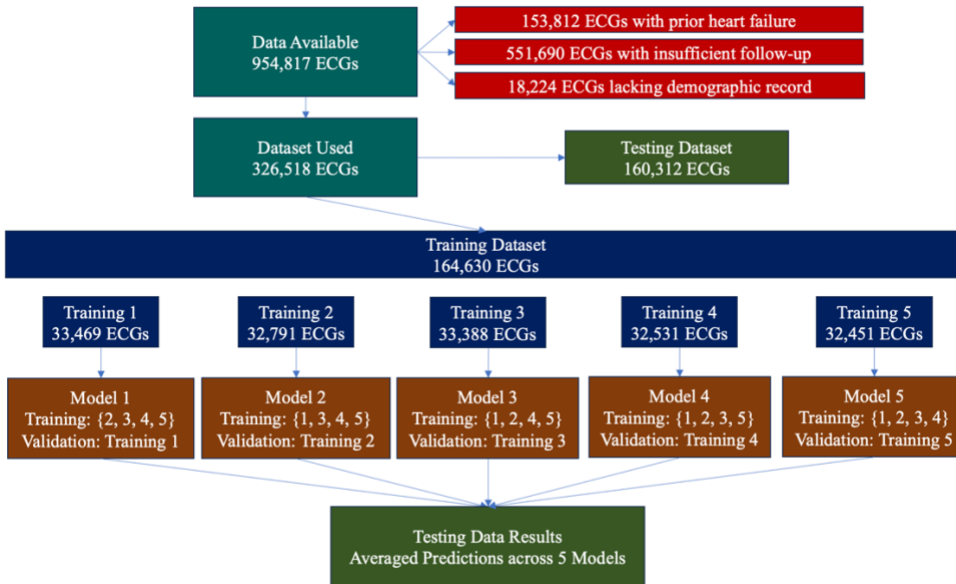

Figure S3: Approaches to reducing disparities in model performance: pre-processing, training modifications, and post-processing

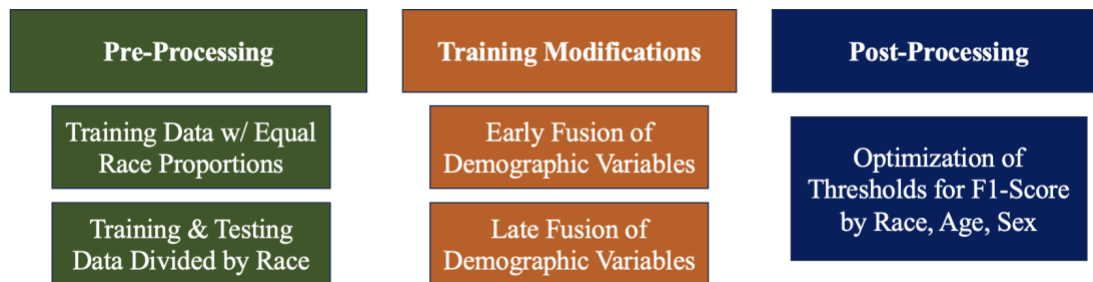

Figure S4: (a) Modifications to model architecture for early fusion of demographic variables (b) Modifications to model architecture for late fusion of demographic variables

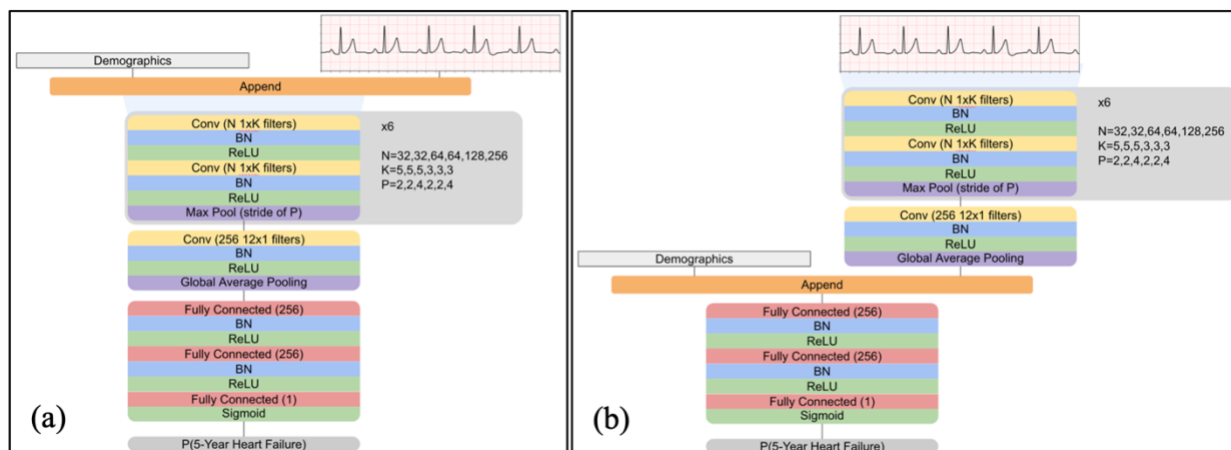

Figure S5. Age-related AUC (area under the curve) trends stratified by race and gender

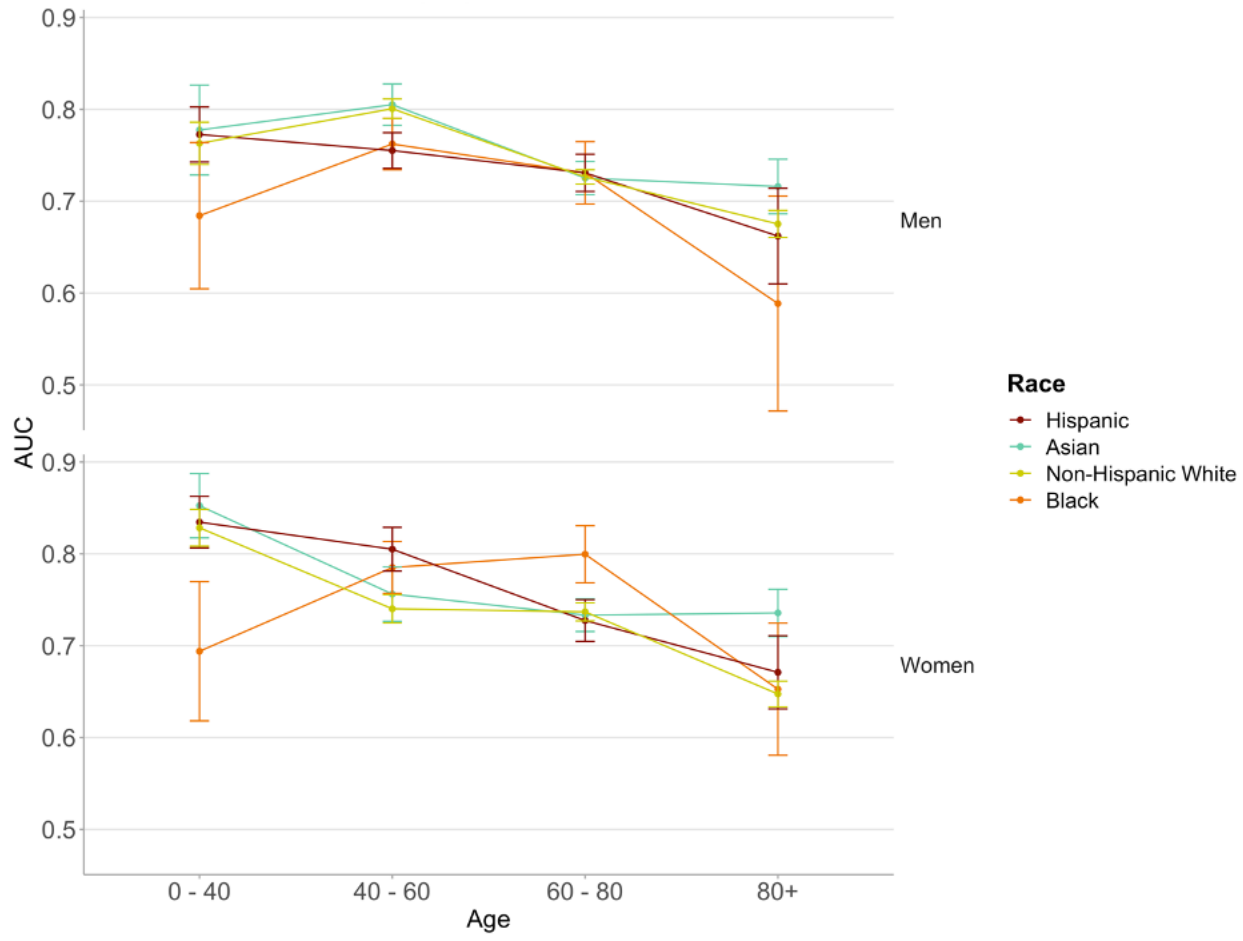

Figure S6. Receiver operating characteristic curves stratified by gender across age groups

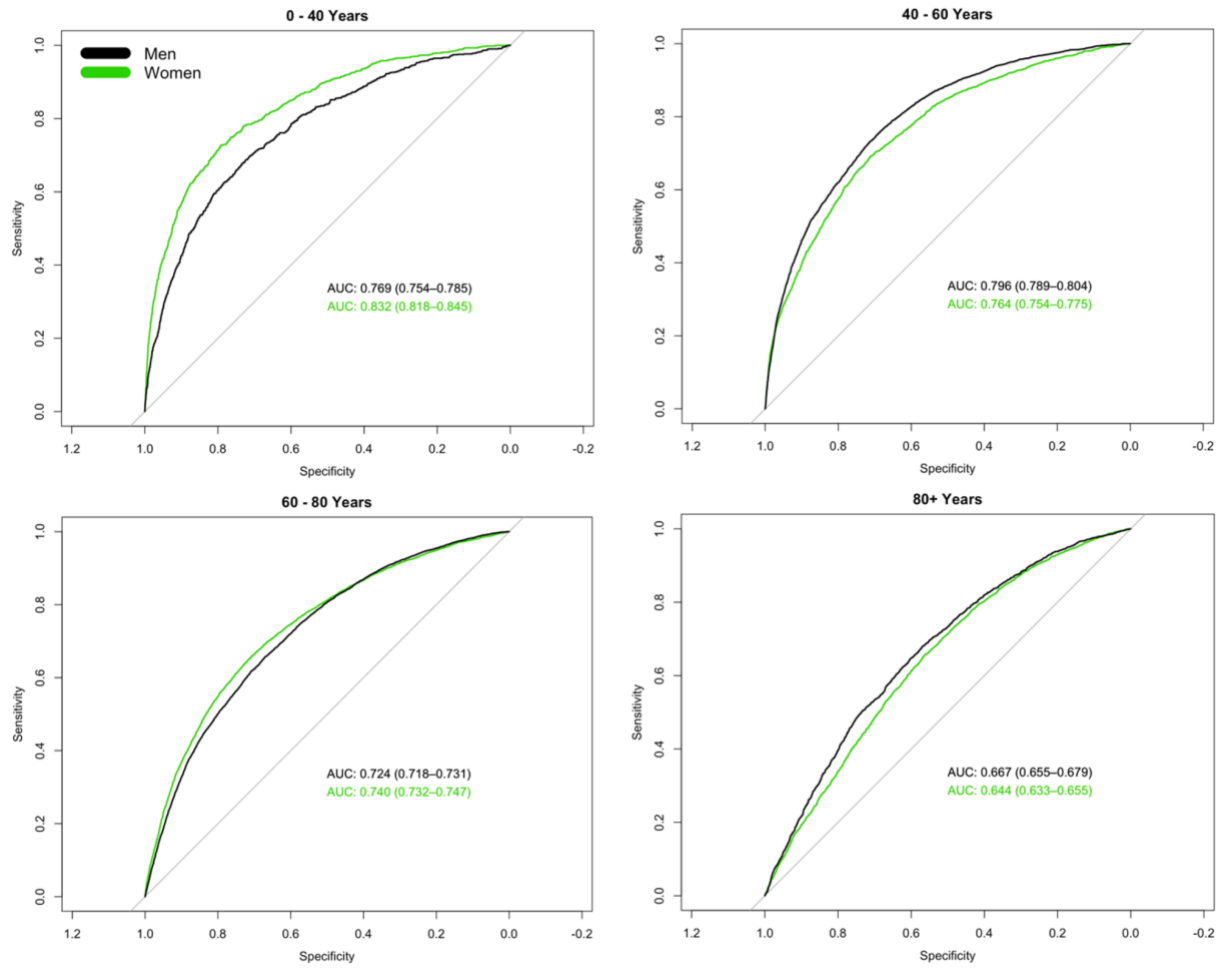

Figure S7. Probability distributions of cases with and without incident heart failure (HF) by race and gender

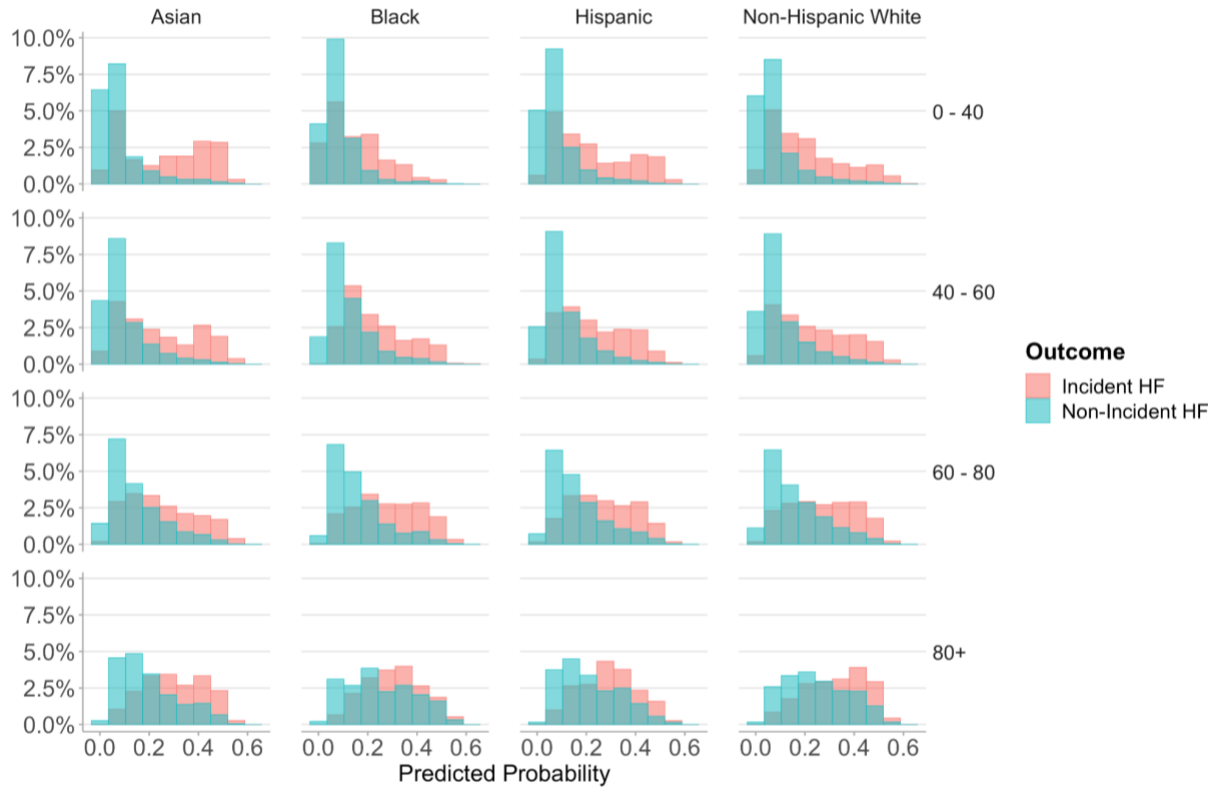

Figure S8. Receiver operating characteristic curves stratified by race and age from a model trained on a dataset with equal racial representation.

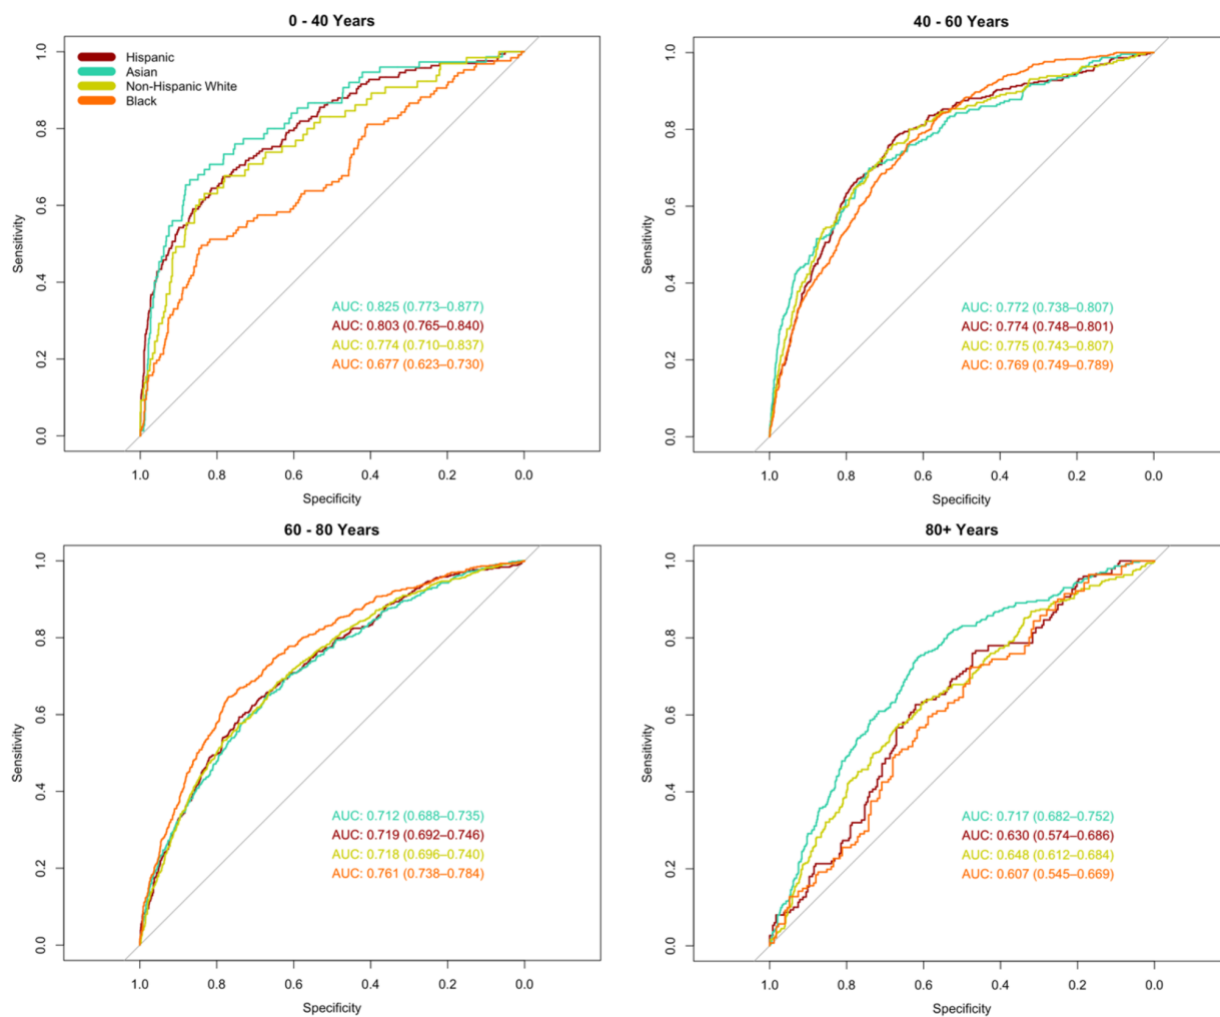

Figure S9. Receiver operating characteristic curves stratified by race and age from models trained separately for each racial group.

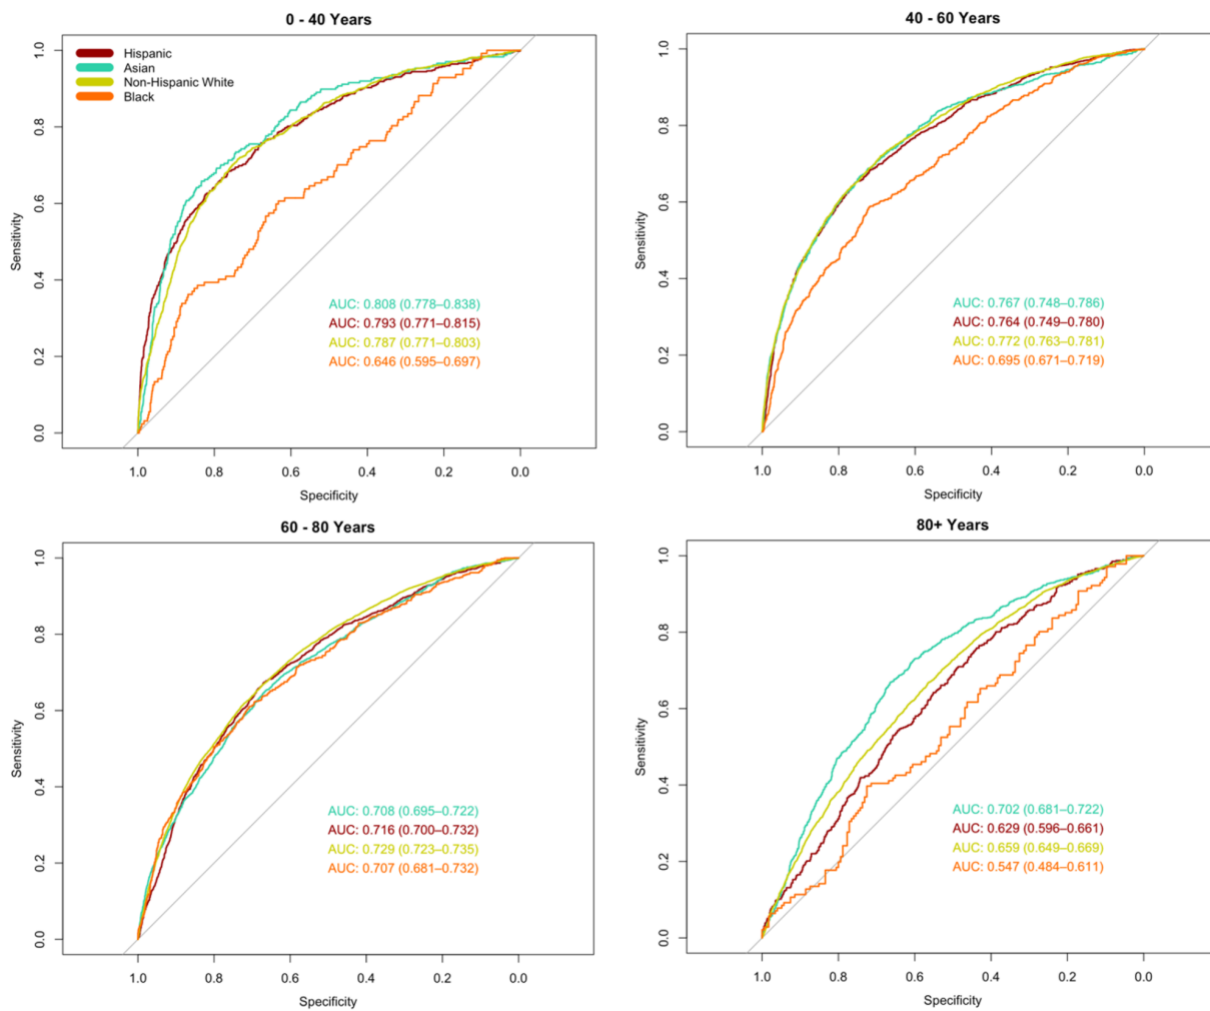

Figure S10. Receiver operating characteristic curves from models trained and tested separately by age group

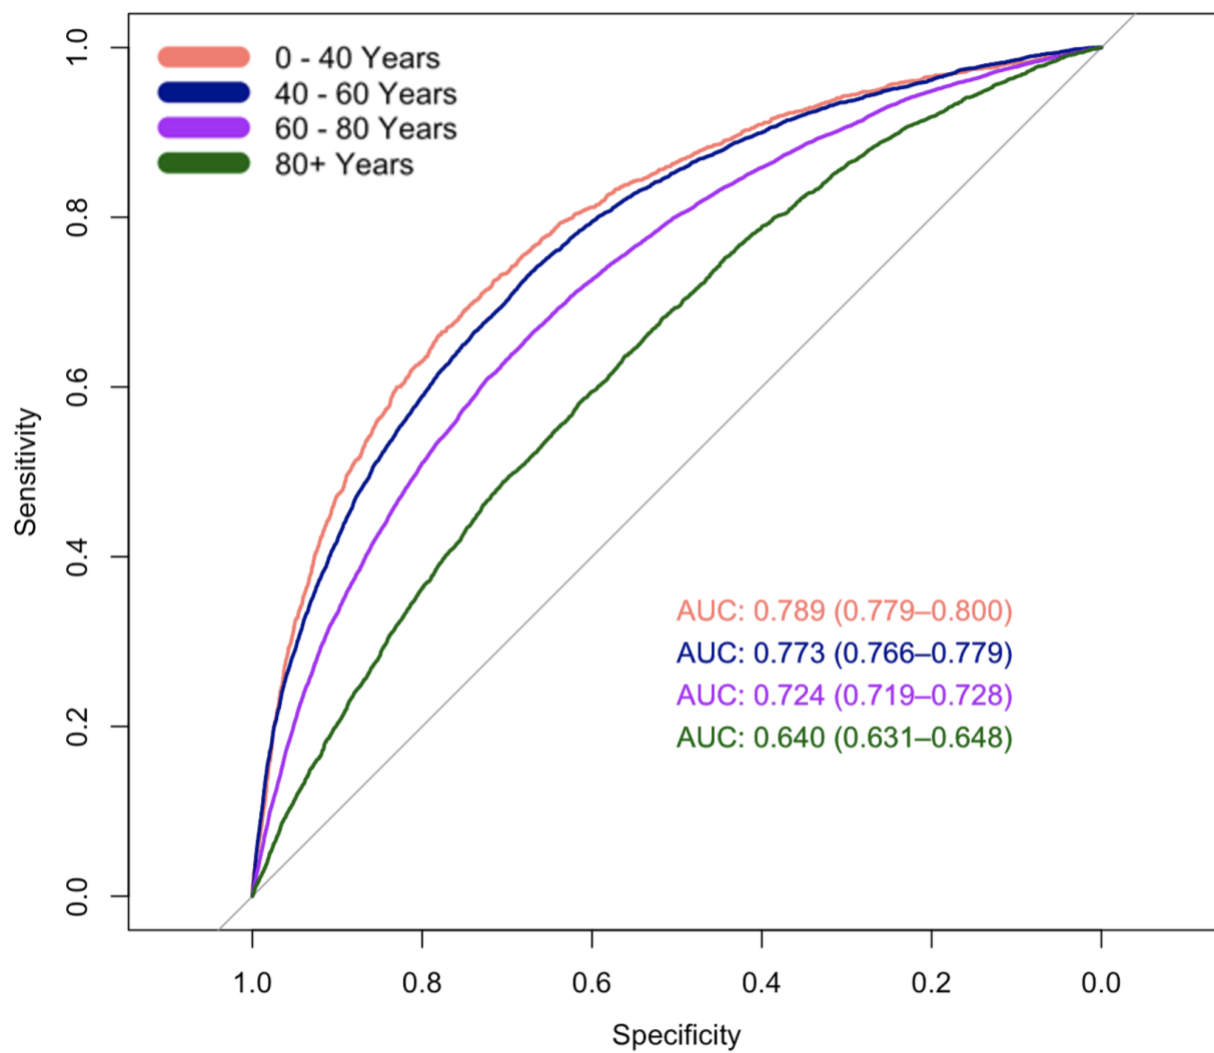



Figure S11. Optimizing threshold for F1-score by subgroups of race, age, and gender

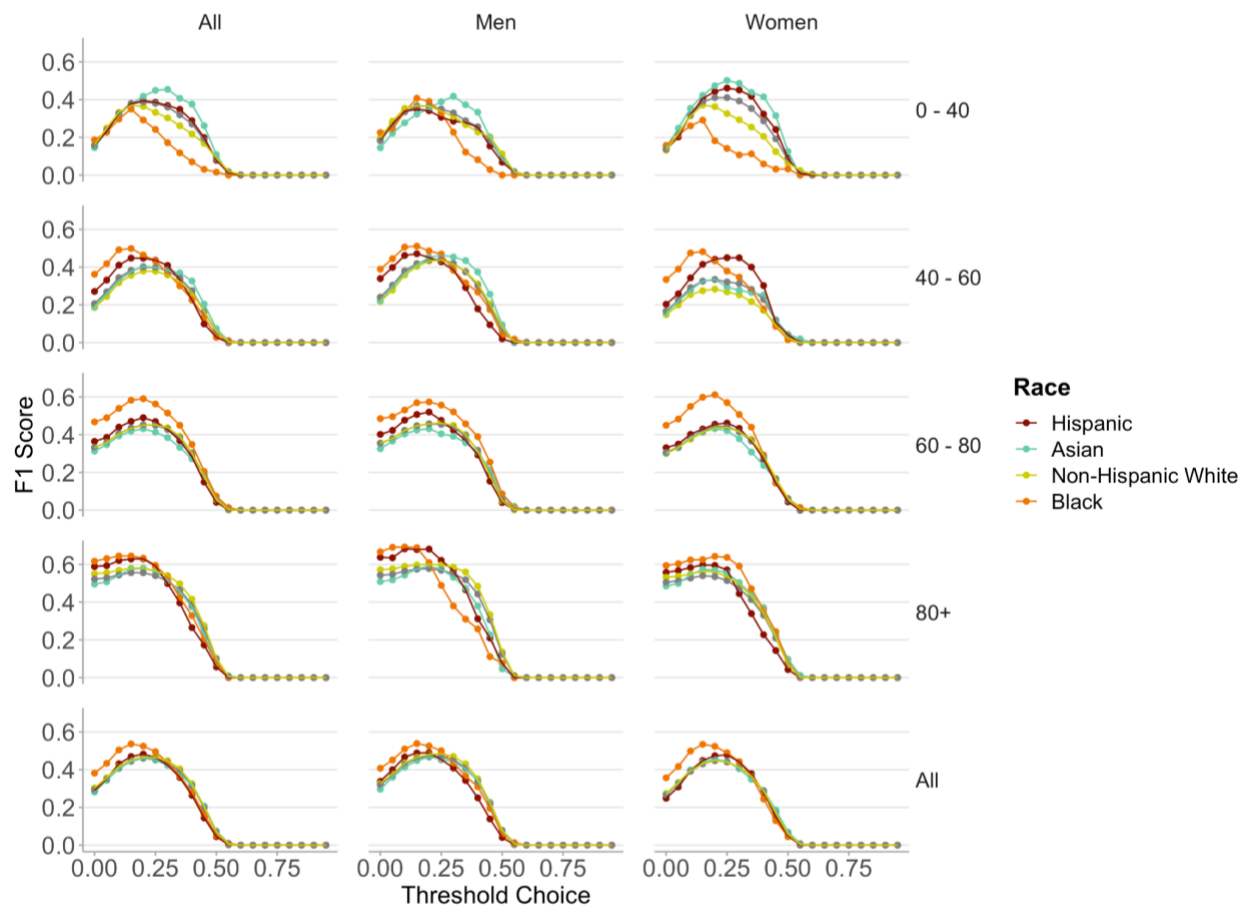

Figure S12. Sample electrocardiograms showing a) Non-Hispanic White man with high predicted probability who developed heart failure (HF), b) Non-Hispanic White woman with low predicted probability who did not develop heart failure, c) Asian man with high predicted probability who did not develop heart failure, d) Non-Hispanic White woman aged >80 years with high predicted probability who did not develop HF, e) Black woman aged 0-40 with low predicted probability who developed heart failure, and f) Black woman aged 0-40 with high predicted probability who did not develop heart failure

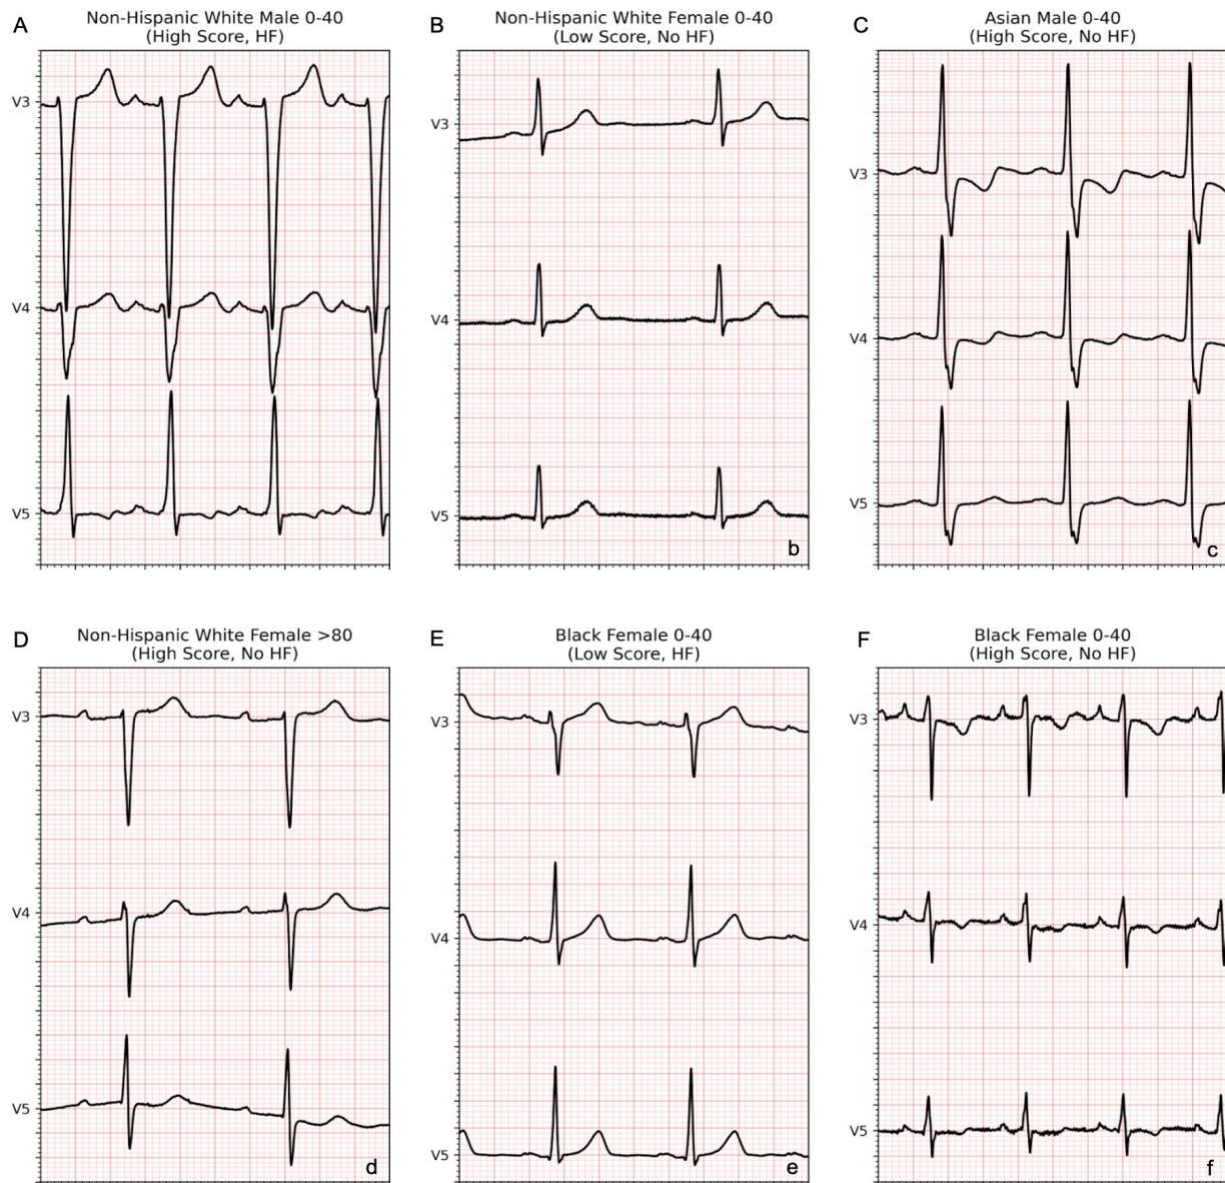

Figure S13: Sensitivity analyses using BNP (B-type natriuretic peptide) as part of heart failure diagnosis for age-based disparities in model performance

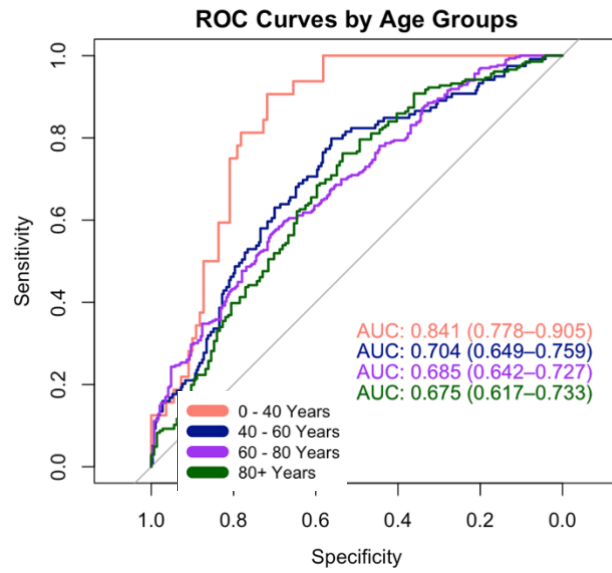

Figure S14: AUC (area under the curve) values and receiver operating characteristic curves stratified by race and age using a blanking period of three days from electrocardiogram collection

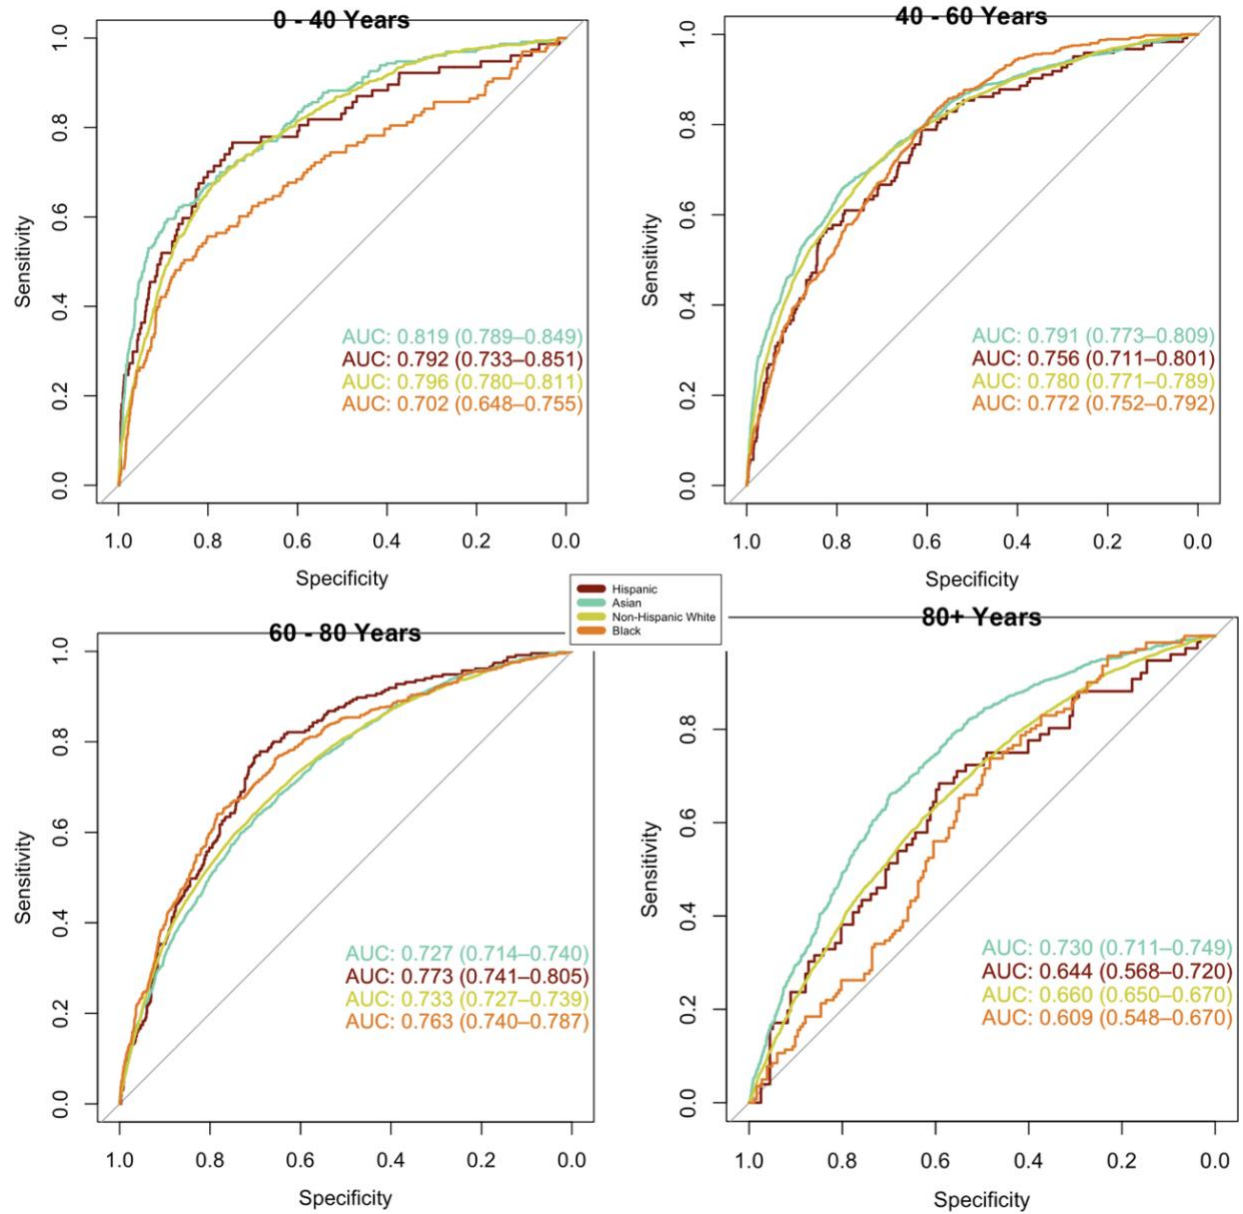

Table S1. Demographics of heart failure (HF) cases by race, gender, and age

| Race     | Age     | Gender | Total | HF Cases | Percent w/ HF |
|----------|---------|--------|-------|----------|---------------|
| Asian    | 0 - 40  | Men    | 1335  | 104      | 7.8           |
|          |         | Women  | 1683  | 133      | 7.9           |
|          | 40 - 60 | Men    | 3503  | 437      | 12.5          |
|          |         | Women  | 3541  | 303      | 8.6           |
|          | 60 - 80 | Men    | 4575  | 888      | 19.4          |
|          |         | Women  | 5045  | 894      | 17.7          |
|          | >80     | Men    | 1225  | 418      | 34.1          |
|          |         | Women  | 1555  | 498      | 32.0          |
| Black    | 0 - 40  | Men    | 519   | 66       | 12.7          |
|          |         | Women  | 713   | 61       | 8.6           |
|          | 40 - 60 | Men    | 1329  | 321      | 24.2          |
|          |         | Women  | 1312  | 263      | 20.0          |
|          | 60 - 80 | Men    | 975   | 312      | 32.0          |
|          |         | Women  | 973   | 282      | 29.0          |
|          | >80     | Men    | 96    | 48       | 50.0          |
|          |         | Women  | 220   | 93       | 42.3          |
| Hispanic | 0 - 40  | Men    | 2400  | 248      | 10.3          |
|          |         | Women  | 3539  | 256      | 7.2           |
|          | 40 - 60 | Men    | 3327  | 680      | 20.4          |
|          |         | Women  | 3636  | 412      | 11.3          |

|                       |         |       |       |      |      |
|-----------------------|---------|-------|-------|------|------|
|                       | 60 - 80 | Men   | 2716  | 682  | 25.1 |
|                       |         | Women | 3124  | 619  | 19.8 |
|                       | >80     | Men   | 421   | 197  | 46.8 |
|                       |         | Women | 711   | 275  | 38.7 |
| Non-Hispanic<br>White | 0 - 40  | Men   | 4346  | 472  | 10.9 |
|                       |         | Women | 5749  | 405  | 7.0  |
|                       | 40 - 60 | Men   | 15315 | 1875 | 12.2 |
|                       |         | Women | 13414 | 1069 | 8.0  |
|                       | 60 - 80 | Men   | 22822 | 4940 | 21.6 |
|                       |         | Women | 17656 | 3113 | 17.6 |
|                       | >80     | Men   | 5233  | 2098 | 40.1 |
|                       |         | Women | 6117  | 2214 | 36.2 |

Table S2. Changes in positive predictive value (PPV), negative predictive value (NPV), and recall using thresholds for binary cutoff optimized via individual F1-score vs overall optimal threshold (0.20)

| Race     | Gender | Age     | Threshold | F1-Score | NPV    | PPV    | Recall |
|----------|--------|---------|-----------|----------|--------|--------|--------|
|          |        |         |           | Change   | Change | Change | Change |
| Asian    | Men    | 0 - 40  | 0.30      | 0.06     | 0.00   | 0.13   | -0.07  |
|          |        | 40 - 60 | 0.25      | 0.01     | -0.01  | 0.07   | -0.08  |
|          |        | 60 - 80 | 0.20      | 0.00     | 0.00   | 0.00   | 0.00   |
|          |        | >80     | 0.20      | 0.00     | 0.00   | 0.00   | 0.00   |
|          | Women  | 0 - 40  | 0.25      | 0.03     | 0.00   | 0.08   | -0.07  |
|          |        | 40 - 60 | 0.20      | 0.00     | 0.00   | 0.00   | 0.00   |
|          |        | 60 - 80 | 0.20      | 0.00     | 0.00   | 0.00   | 0.00   |
|          |        | >80     | 0.15      | 0.00     | 0.06   | -0.04  | 0.15   |
| Black    | Men    | 0 - 40  | 0.15      | 0.02     | 0.01   | -0.08  | 0.14   |
|          |        | 40 - 60 | 0.15      | 0.03     | 0.04   | -0.05  | 0.18   |
|          |        | 60 - 80 | 0.20      | 0.00     | 0.00   | 0.00   | 0.00   |
|          |        | >80     | 0.10      | 0.08     | 0.20   | -0.01  | 0.27   |
|          | Women  | 0 - 40  | 0.15      | 0.11     | 0.02   | 0.03   | 0.21   |
|          |        | 40 - 60 | 0.15      | 0.05     | 0.03   | -0.06  | 0.20   |
|          |        | 60 - 80 | 0.20      | 0.00     | 0.00   | 0.00   | 0.00   |
|          |        | >80     | 0.20      | 0.00     | 0.00   | 0.00   | 0.00   |
| Hispanic | Men    | 0 - 40  | 0.15      | 0.01     | 0.01   | -0.04  | 0.13   |
|          |        | 40 - 60 | 0.15      | 0.02     | 0.03   | -0.04  | 0.16   |

|                       |       |         |      |      |       |       |       |
|-----------------------|-------|---------|------|------|-------|-------|-------|
|                       |       | 60 - 80 | 0.20 | 0.00 | 0.00  | 0.00  | 0.00  |
|                       |       | >80     | 0.10 | 0.00 | 0.11  | -0.06 | 0.16  |
|                       | Women | 0 - 40  | 0.25 | 0.02 | 0.00  | 0.09  | -0.08 |
|                       |       | 40 - 60 | 0.25 | 0.01 | -0.01 | 0.10  | -0.11 |
|                       |       | 60 - 80 | 0.25 | 0.01 | -0.01 | 0.06  | -0.10 |
|                       |       | >80     | 0.15 | 0.00 | 0.04  | -0.05 | 0.13  |
| Non-Hispanic<br>White | Men   | 0 - 40  | 0.15 | 0.00 | 0.01  | -0.04 | 0.10  |
|                       |       | 40 - 60 | 0.25 | 0.01 | -0.01 | 0.06  | -0.11 |
|                       |       | 60 - 80 | 0.25 | 0.00 | -0.02 | 0.04  | -0.11 |
|                       |       | >80     | 0.20 | 0.00 | 0.00  | 0.00  | 0.00  |
|                       | Women | 0 - 40  | 0.15 | 0.01 | 0.01  | -0.04 | 0.16  |
|                       |       | 40 - 60 | 0.20 | 0.00 | 0.00  | 0.00  | 0.00  |
|                       |       | 60 - 80 | 0.25 | 0.00 | -0.01 | 0.05  | -0.12 |
|                       |       | >80     | 0.15 | 0.00 | 0.04  | -0.03 | 0.11  |

Table S3: Average age across racial groups

| Race               | Mean Age [95% CI] |
|--------------------|-------------------|
| Asian              | 60.7 [60.6, 60.9] |
| Black              | 53.5 [53.2, 53.8] |
| Hispanic           | 51.2 [51.0, 51.4] |
| Non-Hispanic White | 61.5 [61.4, 61.5] |



Table S4: Fractions excluded due to prior heart failure (HF) and loss to follow-up by race, age, and gender

| Age     | Gender | Race               | Fraction w/ Prior HF | Fraction Lost to Follow-Up |
|---------|--------|--------------------|----------------------|----------------------------|
| 0 - 40  | Men    | Asian              | 0.14                 | 0.56                       |
|         |        | Black              | 0.16                 | 0.54                       |
|         |        | Hispanic White     | 0.15                 | 0.52                       |
|         |        | Non-Hispanic White | 0.11                 | 0.55                       |
|         | Women  | Asian              | 0.07                 | 0.50                       |
|         |        | Black              | 0.14                 | 0.51                       |
|         |        | Hispanic White     | 0.09                 | 0.48                       |
|         |        | Non-Hispanic White | 0.09                 | 0.51                       |
| 40-60   | Men    | Asian              | 0.18                 | 0.48                       |
|         |        | Black              | 0.29                 | 0.54                       |
|         |        | Hispanic White     | 0.19                 | 0.48                       |
|         |        | Non-Hispanic White | 0.17                 | 0.46                       |
|         | Women  | Asian              | 0.11                 | 0.49                       |
|         |        | Black              | 0.21                 | 0.44                       |
|         |        | Hispanic White     | 0.12                 | 0.49                       |
|         |        | Non-Hispanic White | 0.12                 | 0.44                       |
| 60 - 80 | Men    | Asian              | 0.23                 | 0.52                       |
|         |        | Black              | 0.36                 | 0.57                       |
|         |        | Hispanic White     | 0.20                 | 0.48                       |
|         |        | Non-Hispanic White | 0.24                 | 0.50                       |

|     |       |                    |      |      |
|-----|-------|--------------------|------|------|
|     | Women | Asian              | 0.17 | 0.47 |
|     |       | Black              | 0.29 | 0.56 |
|     |       | Hispanic White     | 0.17 | 0.50 |
|     |       | Non-Hispanic White | 0.17 | 0.49 |
| 80+ | Men   | Asian              | 0.31 | 0.62 |
|     |       | Black              | 0.33 | 0.62 |
|     |       | Hispanic White     | 0.31 | 0.63 |
|     |       | Non-Hispanic White | 0.34 | 0.61 |
|     | Women | Asian              | 0.27 | 0.60 |
|     |       | Black              | 0.35 | 0.63 |
|     |       | Hispanic White     | 0.24 | 0.55 |
|     |       | Non-Hispanic White | 0.28 | 0.58 |

Table S5: Fraction of heart failure diagnoses with elevated BNP (B-type natriuretic peptide)

|      |          | Fraction with Elevated BNP | n    |
|------|----------|----------------------------|------|
| Age  | 0 – 40   | 0.71 [0.67 – 0.76]         | 381  |
|      | 40 – 60  | 0.81 [0.79 – 0.83]         | 1211 |
|      | 60 – 80  | 0.89 [0.88 – 0.90]         | 1923 |
|      | 80+      | 0.97 [0.96 – 0.98]         | 966  |
| Race | Asian    | 0.84 [0.82 – 0.86]         | 864  |
|      | Black    | 0.82 [0.77 – 0.85]         | 355  |
|      | Hispanic | 0.83 [0.80 – 0.86]         | 651  |

|        |                    |                    |      |
|--------|--------------------|--------------------|------|
|        | Non-Hispanic White | 0.90 [0.89 – 0.91] | 2611 |
| Gender | Men                | 0.86 [0.85 – 0.88] | 2137 |
|        | Women              | 0.88 [0.87 – 0.89] | 2344 |

Table S6: Average number of interaction days with the healthcare system per patient by race and age group

| Race               | Age     | Average # Visit Days per Patient |
|--------------------|---------|----------------------------------|
| Asian              | 0 - 40  | 72 [68, 76]                      |
| Black              |         | 70 [63, 78]                      |
| Hispanic White     |         | 67 [60, 74]                      |
| Non-Hispanic White |         | 68 [65, 70]                      |
| Asian              | 40 - 60 | 87 [84, 91]                      |
| Black              |         | 78 [73, 84]                      |
| Hispanic White     |         | 77 [70, 83]                      |
| Non-Hispanic White |         | 75 [74, 77]                      |
| Asian              | 60 - 80 | 92 [89, 95]                      |
| Black              |         | 90 [84, 96]                      |
| Hispanic White     |         | 68 [62, 75]                      |
| Non-Hispanic White |         | 83 [82, 84]                      |
| Asian              | 80+     | 75 [70, 80]                      |
| Black              |         | 68 [58, 78]                      |
| Hispanic White     |         | 59 [47, 72]                      |
| Non-Hispanic White |         | 66 [64, 68]                      |

Table S7: Ratio of predicted risk of heart failure between primary model trained on electrocardiogram data compared to linear regression model trained on clinical risk factors (prior CAD (coronary artery disease) or MI (myocardial infarction), prior stroke, diabetes, blood pressure, BMI (body mass index), and smoking history) and demographic variables (race, gender, age)

|      |                    | Ratio of Model Risk Predictions |
|------|--------------------|---------------------------------|
| Age  | 0 - 40             | 10.5 [10.3 – 10.7]              |
|      | 40 - 60            | 8.5 [8.4 – 8.6]                 |
|      | 60 - 80            | 5.6 [5.6 – 5.7]                 |
|      | 80+                | 3.3 [3.2 – 3.3]                 |
| Race | Asian              | 7.2 [7.1 – 7.4]                 |
|      | Black              | 5.9 [5.7 – 6.1]                 |
|      | Hispanic White     | 7.1 [6.8 – 7.3]                 |
|      | Non-Hispanic White | 6.6 [6.6 – 6.7]                 |
| Sex  | Men                | 6.2 [6.2 – 6.3]                 |
|      | Women              | 7.3 [7.2 – 7.4]                 |
